# Supplementary material for: Excited-state dynamics of 4-hydroxyisoindoline-1,3-dione and its derivative as fluorescent probes
Source: Royal Society of Chemistry journal article supplement (doi:10.1039/d3cp05777a), 2024-01-01
Supplement: d3cp05777a1.pdf [file d3cp05777a1.pdf]

**- Supporting Information -**

**Excited-State Dynamics of 4-hydroxyisoindoline-1,3-dione  
and Its Derivative as Fluorescent Probe**

Li Zhao,<sup>a</sup> Simin Jiang,<sup>b</sup> Yanmei He,<sup>b,c</sup> Luling Wu,<sup>\*,d</sup> Tony D. James,<sup>d,e</sup> and Junsheng Chen,<sup>\*,b</sup>

<sup>a</sup> *College of science, China University of Petroleum (East China) Qingdao 266580, Shandong, China*

<sup>b</sup> *Nano-Science Center & Department of Chemistry University of Copenhagen Universitetsparken 5, 2100 KøbenhavnØ (Denmark)*

<sup>c</sup> *Department of Chemical Physics and NanoLund, Lund University, P.O. Box 124, 22100 Lund, Sweden*

<sup>d</sup> *Department of Chemistry, University of Bath, Bath, BA2 7AY, UK*

<sup>e</sup> *School of Chemistry and Chemical Engineering, Henan Normal University, Xinxiang 453007, China*

## **Table of contents**

- 1. Materials and methods**
- 2. NMR results**
- 3. Results**
- 4. Cartesian coordinates of the optimized structure of BHID and BHID-Bpin.**
- 5. References**

## 1. Materials and methods

All starting materials and reagents were purchased from Sigma Aldrich and used as received without any further purification. BHID and probe BHID-Bpin were synthesized following our reported procedure<sup>1</sup>.

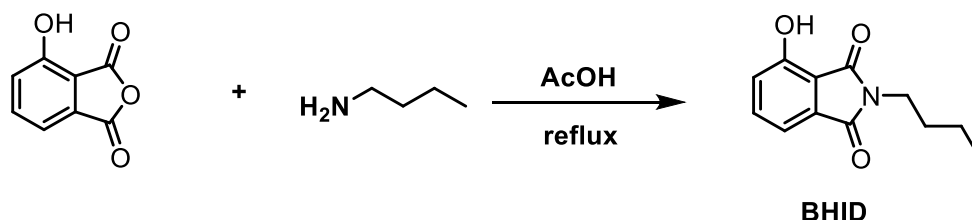

**Fig. S1.** Synthetic route to achieve the BHID

**Synthesis of BHID** 3-Hydroxyphthalic anhydride (0.77 g, 4.69 mmol, 1.0 equiv.) was dissolved in acetic acid (40 mL), then butylamine (0.51 g, 7.04 mmol, 1.5 equiv.) was added. The mixture was further heated under reflux for 2.5 hours, TLC was used to monitor the reaction until the 3-hydroxyphthalic anhydride was consumed. The solvent was removed under vacuum, the crude product was purified by silica chromatography using elute solvents (PE/EtOAc = 10/1, v/v). BHID was then obtained as a white solid (0.90 g, yield 88%). <sup>1</sup>H NMR (500 MHz, CDCl<sub>3</sub>) δH 7.64 (s, 1H), 7.57 – 7.54 (m, 1H), 7.36 (d, *J* = 7.2 Hz, 1H), 7.14 (d, *J* = 8.4 Hz, 1H), 3.63 (t, *J* = 7.2 Hz, 2H), 1.67 – 1.61 (m, 2H), 1.39 – 1.32 (m, 2H), 0.94 (t, *J* = 7.4 Hz, 3H). <sup>13</sup>C NMR (126 MHz, CDCl<sub>3</sub>) δC 170.7, 168.1, 154.7, 136.4, 132.3, 122.6, 116.0, 114.8, 37.8, 30.7, 20.2, 13.7.

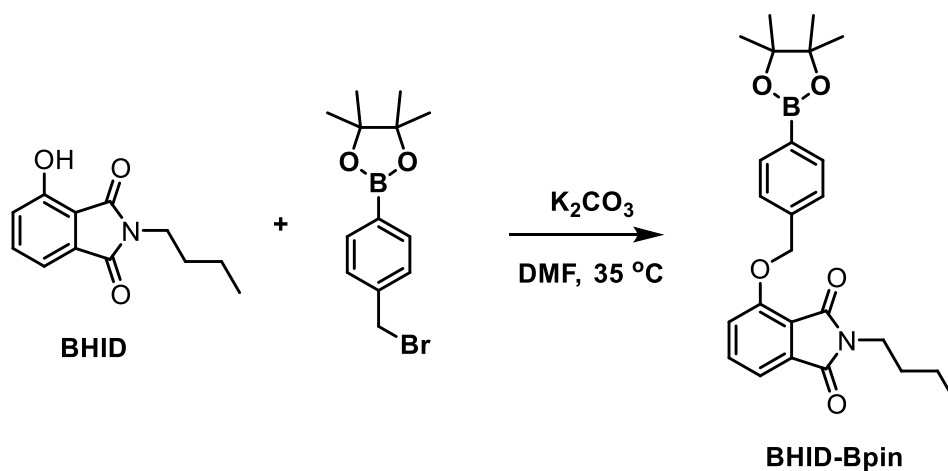

**Fig. S2.** Synthetic route to achieve BHID-Bpin

**Synthesis of BHID-Bpin** BHID (0.30 g, 1.37 mmol, 1.0 equiv.), 4-bromomethylphenylboronic acid pinacol ester (0.49 g, 1.64 mmol, 1.2 equiv.) and  $K_2CO_3$  (0.38 g, 2.74mmol, 2.0 equiv.) were dissolved in dry DMF (7 mL). The mixture was then stirred for 6 hours at 35 °C. TLC was used to monitor the reaction until the BHID consumed. The solvent was removed under vacuum, the crude product was purified by silica chromatography using elute solvents (PE/EtOAc = 20/1, v/v). BHID-Bpin was then obtained as a white solid (0.194 g, 33%).  $^1H$  NMR (500 MHz,  $CDCl_3$ )  $\delta$ H 7.82 (d,  $J$  = 7.7 Hz, 2H), 7.55-7.52 (m, 1H), 7.47 (d,  $J$  = 7.6 Hz, 2H), 7.40 (d,  $J$  = 7.2 Hz, 1H), 7.13 (d,  $J$  = 8.4 Hz, 1H), 5.36 (s, 2H), 3.66 (t,  $J$  = 7.2Hz, 2H), 1.68 – 1.62 (m, 2H), 1.39 - 1.33 (m, 14H), 0.94 (t,  $J$  = 7.3 Hz, 3H).  $^{13}C$  NMR (126 MHz,  $CDCl_3$ )  $\delta$ C 168.3, 167.1, 155.6, 139.1, 135.8, 135.3, 134.6, 126.1, 119.6, 118.3, 115.8, 84.0, 71.0, 37.8, 30.8, 25.0, 20.2, 13.8.

## 2. NMR results

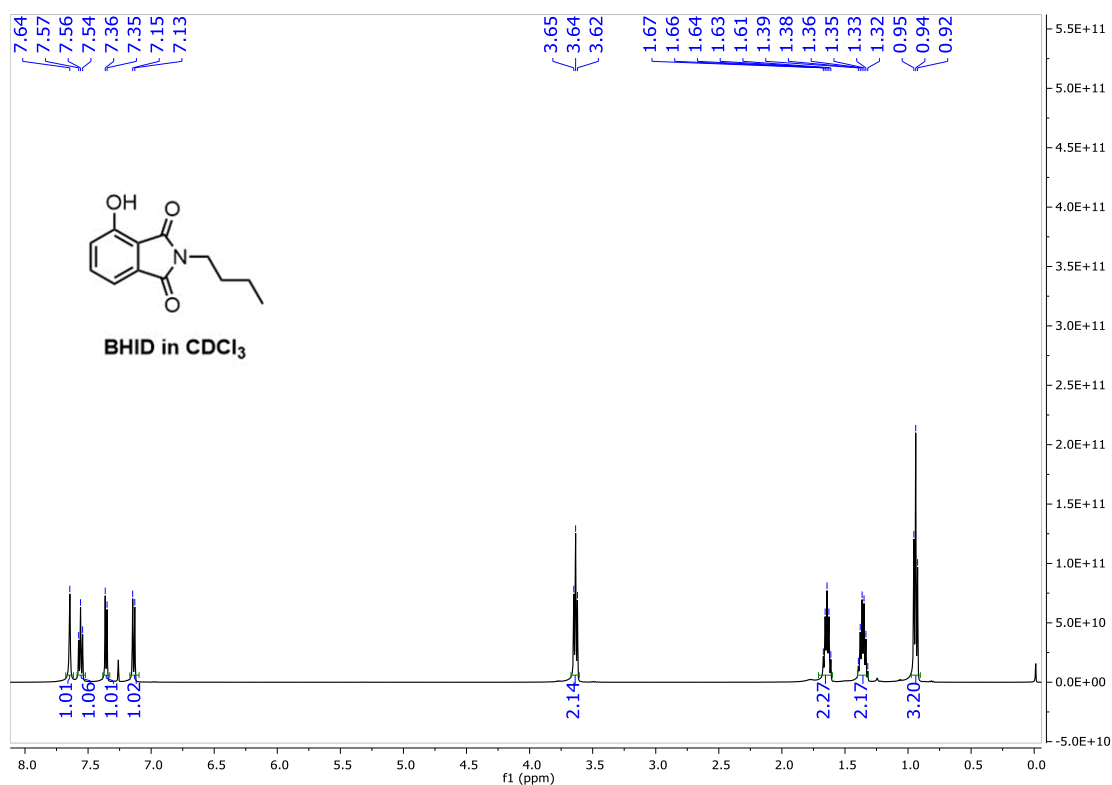

**Fig. S3.** <sup>1</sup>H NMR spectra (500 MHz, CDCl<sub>3</sub>) of BHID

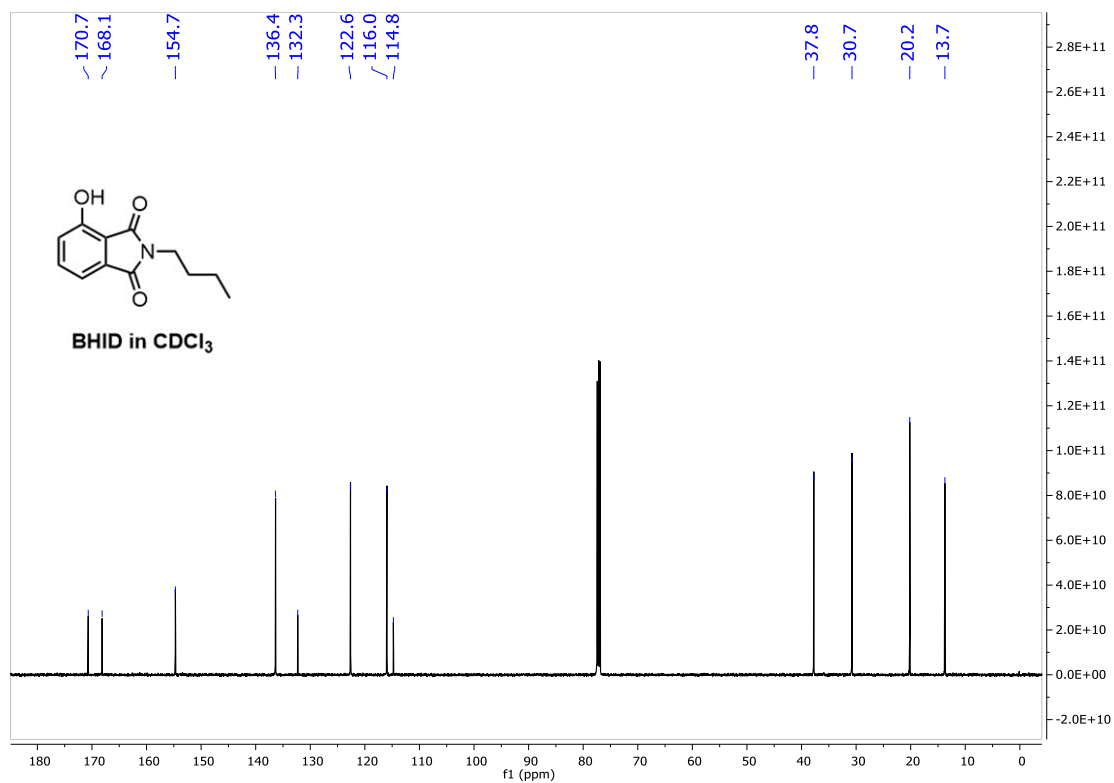

**Fig. S4.** <sup>13</sup>C NMR spectra (126 MHz, CDCl<sub>3</sub>) of BHID

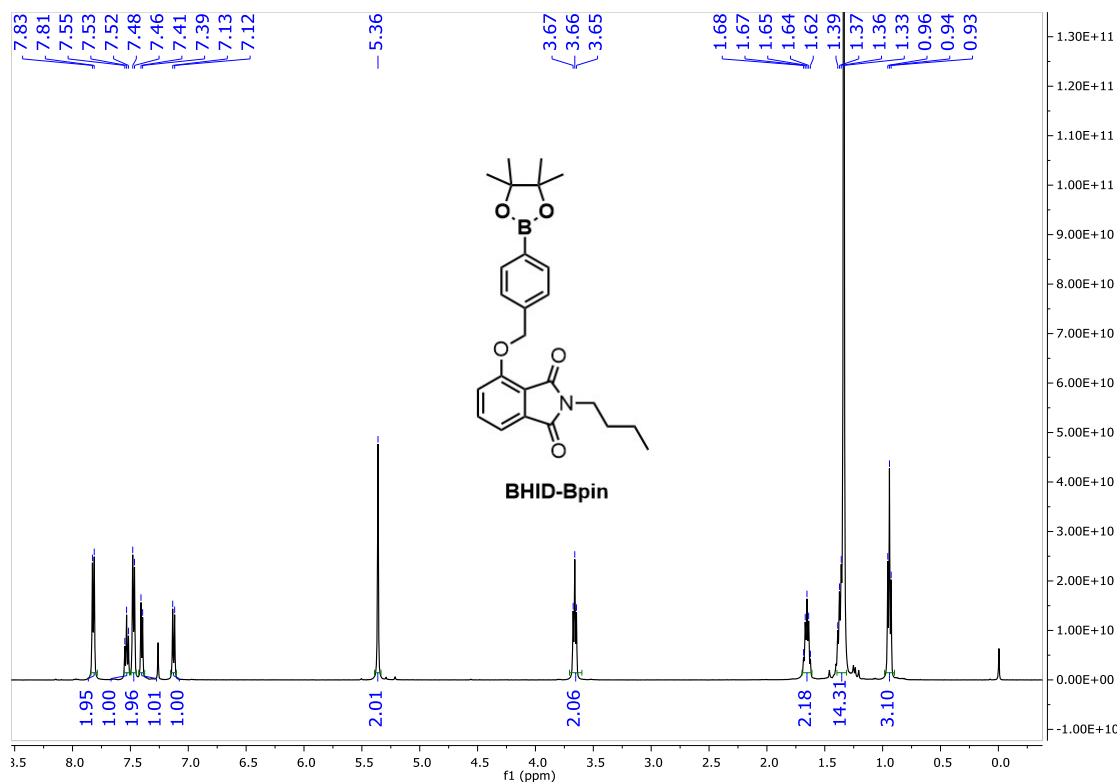

**Fig. S5.**  $^1\text{H}$  NMR spectra (500 MHz,  $\text{CDCl}_3$ ) of BHID-Bpin

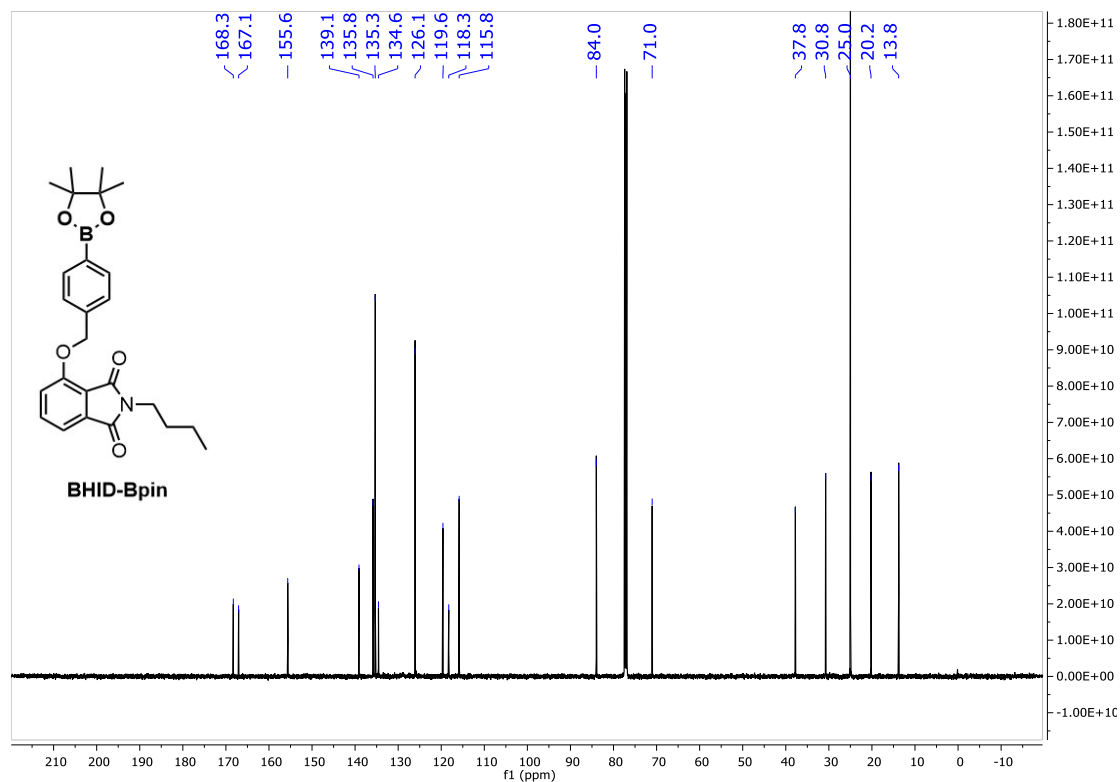

**Fig. S6.**  $^{13}\text{C}$  NMR (126 MHz,  $\text{CDCl}_3$ ) of BHID-Bpin

### 3. Results

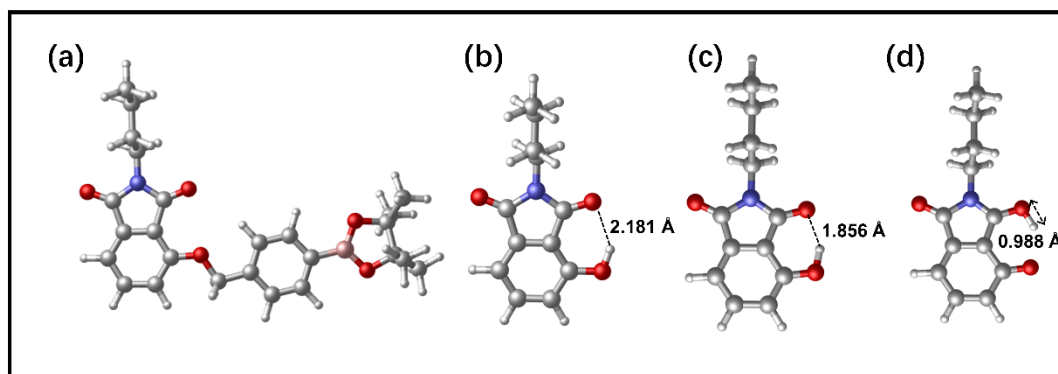

**Fig. S7.** The optimized structures of the BHID-Bpin (a); enol-BHID in the  $S_0$  (b), in the  $S_1$  (c), keto-BHID in the  $S_1$  (d) in acetonitrile at DFT//CAM-B3LYP//6-31+G(d,p) level.

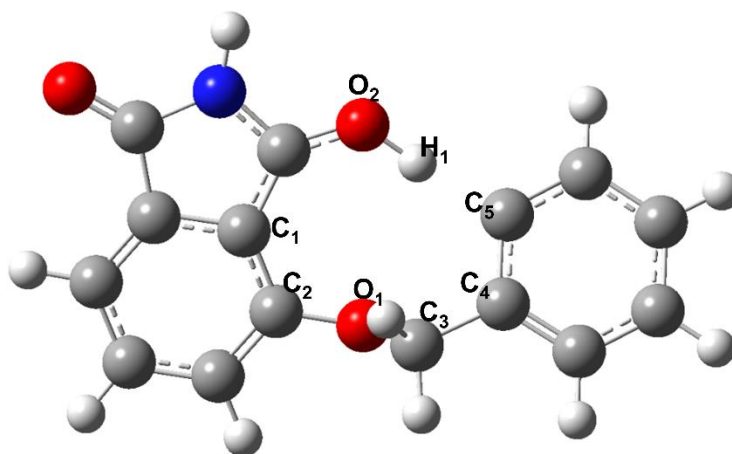

**Fig. S8.** The truncated model of BHID-Bpin in acetonitrile for high level quantum chemistry calculation for locating the minimum energy conical intersection (MECI).

**Table S1.** Key configurational parameters for the truncated model for BHID-Bpin in acetonitrile (shown in Fig. S8) at FC, TS and MECI points.

|      | $O_2 \cdots H_1$ (Å) | $C_2O_1C_3C_4$ (°) | $C_1C_2O_1C_3$ (°) | $O_1C_3C_4C_5$ (°) |
|------|----------------------|--------------------|--------------------|--------------------|
| FC   | 2.924                | 179.9              | -179.9             | 0.0                |
| TS   | 2.542                | -159.2             | 147.1              | 32.2               |
| MECI | 1.054                | -144.9             | 82.8               | 57.4               |

**Table S2.** The vertical excitation energy (VE) of the truncated model for BHID-Bpin in acetonitrile (shown in Fig. S8) at FC point calculated with CASSCF(4,4) and CASSCF(8,8) calculation level.

| Methods | CASSCF(4,4)//6-31G(d,p) | CASSCF(8,8)//6-31G(d,p) | CASSCF(8,8)// aug-cc-pVDZ |
|---------|-------------------------|-------------------------|---------------------------|
| VE (eV) | 4.23                    | 4.23                    | 4.07                      |

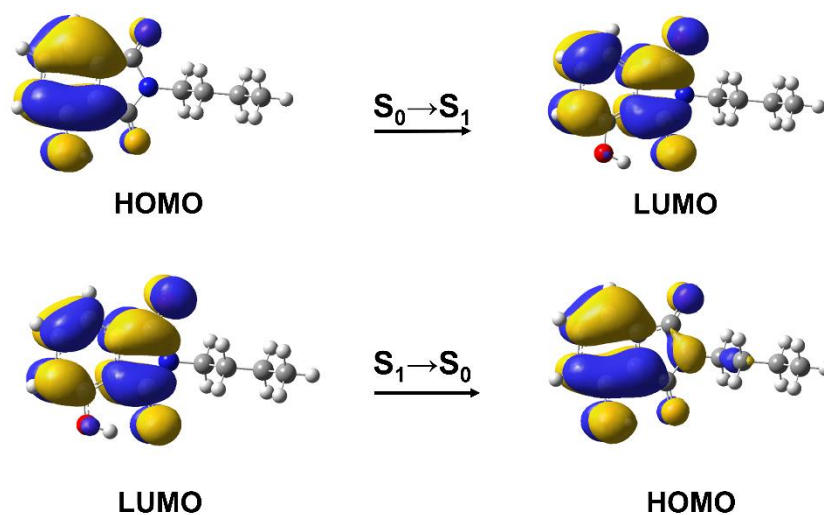

**Fig. S9.** Orbitals and the relevant transitions involved in BHID in acetonitrile at TD-DFT//CAM-B3LYP//6-31+G(d,p) level.

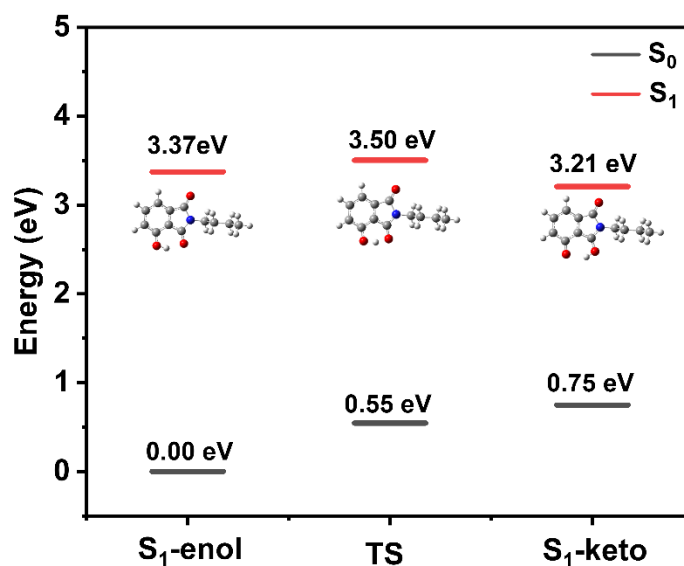

**Fig. S10.** The energy diagram of the critical points of the BHID system in acetonitrile.



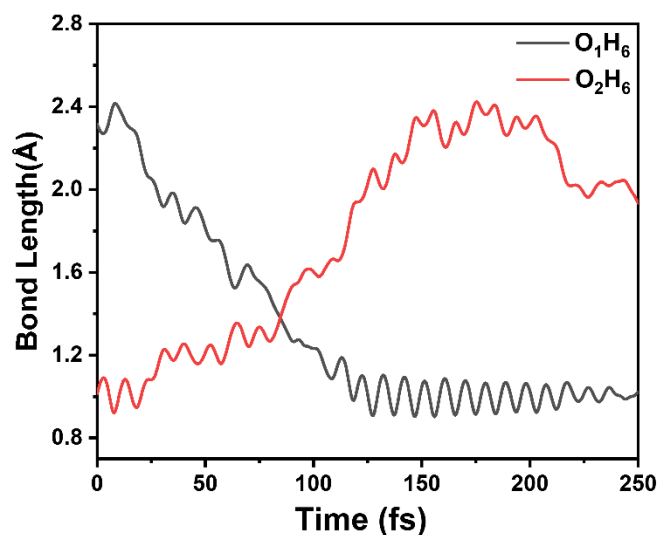

**Fig. S11.** The time evolution of the  $O_1-H_6$  and  $O_2-H_6$  distances averaged over 7 trajectories within the 250fs for BHID system in acetonitrile at TDDFT//CAM-B3LYP//6-31+G(d,p) level.

**Table S3** Calculated vertical transition energy and transition oscillator strength ( $f$ ) of BHID-Bpin in water at TD-DFT//CAM-B3LYP //6-31+G(d,p) level.

| Electronic transition | Energy (nm, eV) | Contrib. <sup>a</sup>   | $f^b$  |
|-----------------------|-----------------|-------------------------|--------|
| $S_0 \rightarrow S_1$ | 303 (4.08)      | H $\rightarrow$ L (73%) | 0.1248 |
| $S_1 \rightarrow S_0$ | 364 (3.40)      | L $\rightarrow$ H (79%) | 0.1379 |

<sup>a</sup> H means the HOMO, L means the LUMO; <sup>b</sup>  $f$  means the transition oscillator strength.

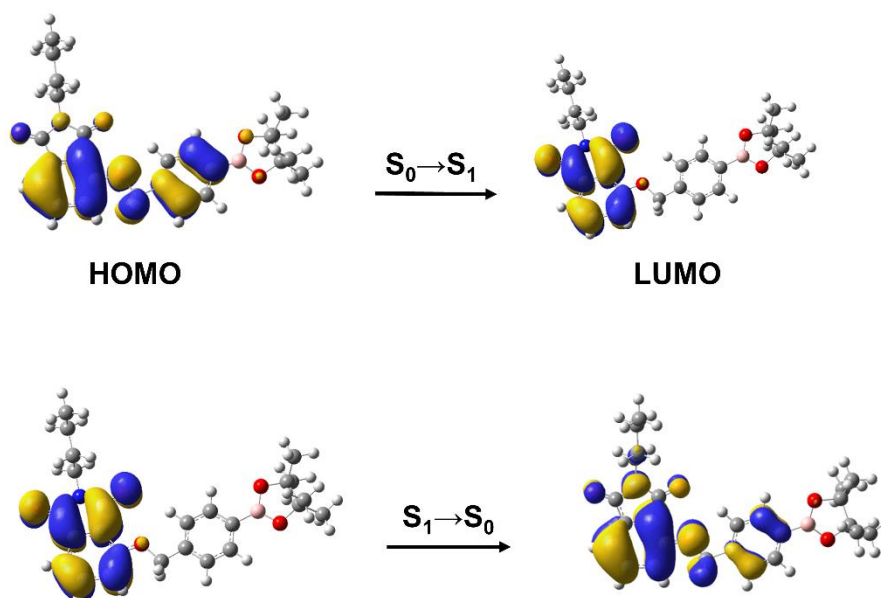

**Fig. S12.** Orbitals and the relevant transitions involved in the first excited state of BHID-Bpin in water at TD-DFT//CAM-B3LYP //6-31+G(d,p) level.

**Table S4** Calculated vertical transition energy and transition oscillator strength ( $f$ ) of enol- and keto-BHID in water at TD-DFT//CAM-B3LYP //6-31+G(d,p) level.

| Geometry | Electronic transition | Energy (nm, eV) | Contrib. <sup>a</sup>   | $f^b$  |
|----------|-----------------------|-----------------|-------------------------|--------|
| enol     | $S_0 \rightarrow S_1$ | 301 (4.11)      | H $\rightarrow$ L (83%) | 0.1344 |
|          | $S_1 \rightarrow S_0$ | 368 (3.37)      | L $\rightarrow$ H (88%) | 0.1629 |
| keto     | $S_1 \rightarrow S_0$ | 505 (2.45)      | L $\rightarrow$ H (96%) | 0.2706 |

<sup>a</sup> H means the HOMO, L means the LUMO; <sup>b</sup>  $f$  means the transition oscillator strength.

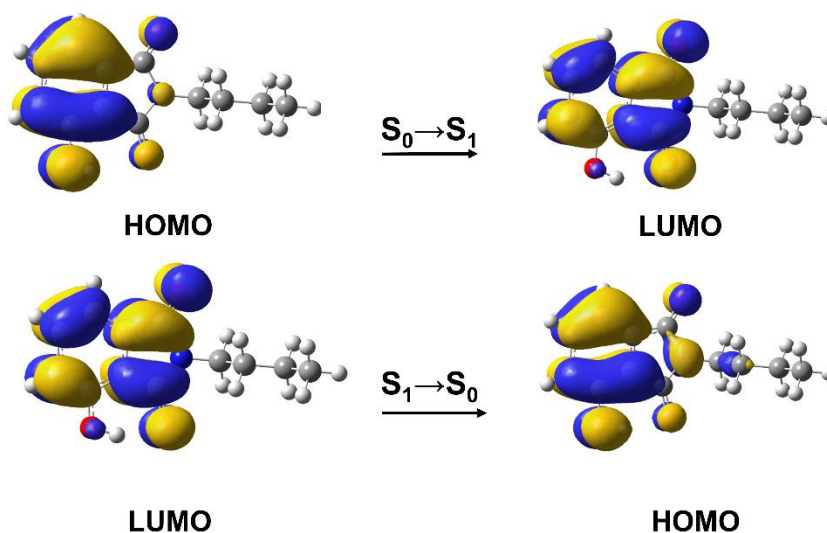

**Fig. S13.** Orbitals and the relevant transitions involved in BHID in water at TD-DFT//CAM-B3LYP//6-31+G(d,p) level.

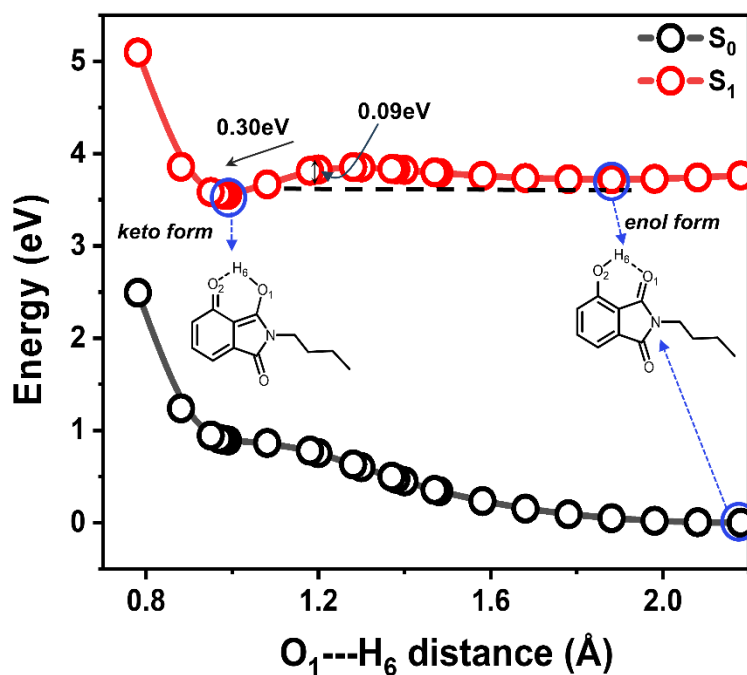

**Fig. S14.** The calculated potential energy curves of  $S_1$  and  $S_0$  of BHID in water computed at

TDDFT//CAM-B3LYP//6-31+G(d,p) level.

**Table S5** Calculated vertical transition energy and transition oscillator strength ( $f$ ) of enol-BHID cluster with one H<sub>2</sub>O molecule at TD-DFT//CAM-B3LYP //6-31+G(d,p) level.

| Geometry                   | Electronic transition          | Energy (nm, eV) | Contrib. <sup>a</sup> | $f^b$  |
|----------------------------|--------------------------------|-----------------|-----------------------|--------|
| Enol-BHID-H <sub>2</sub> O | S <sub>0</sub> →S <sub>1</sub> | 256 (4.85)      | H→L (95%)             | 0.2439 |

<sup>a</sup> H means the HOMO, L means the LUMO; <sup>b</sup>  $f$  means the transition oscillator strength.

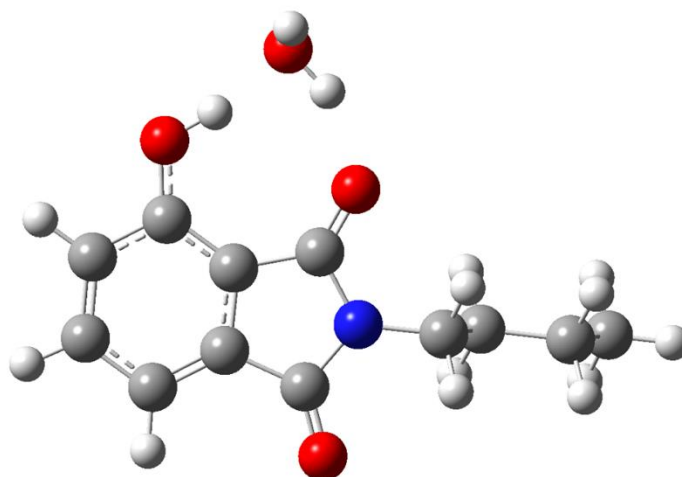

**Fig. S15.** The most stable structure in S<sub>0</sub> of enol-BHID-H<sub>2</sub>O complex in water optimized at TD-DFT//CAM-B3LYP//6-31+G(d,p) level.

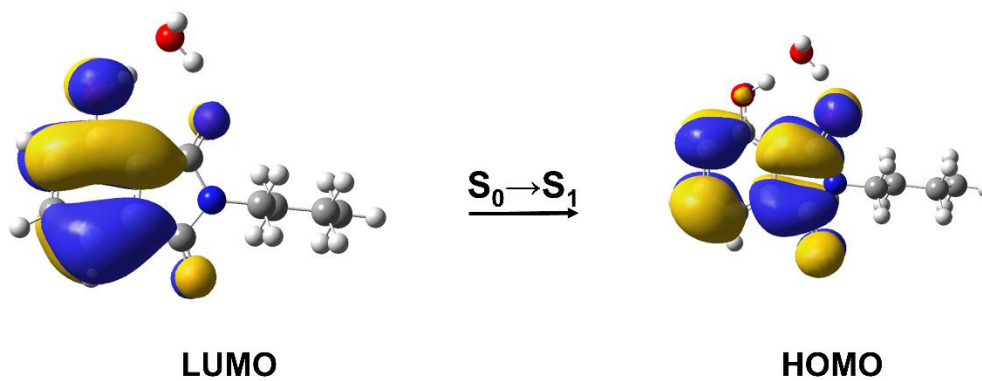

**Fig. S16.** Orbitals and the relevant transitions involved in enol-BHID-H<sub>2</sub>O in water at TD-DFT//CAM-B3LYP//6-31+G(d,p) level.

#### 4. Cartesian coordinates of the optimized structure of BHID and BHID-Bpin.

**Table S6** Cartesian coordinates of equilibrium structure of enol-BHID in the  $S_0$  (left) and  $S_1$  (right) optimized with DFT//CAM-B3LYP//6-31+G(d,p) and TD-DFT//CAM- B3LYP //6-31+G(d,p) method, respectively.

| DFT//CAM- B3LYP //6-31+G(d,p) |             |             |             | TD-DFT//CAM- B3LYP/ /6-31+G(d,p) |                 |                 |                 |
|-------------------------------|-------------|-------------|-------------|----------------------------------|-----------------|-----------------|-----------------|
|                               | X           | Y           | Z           |                                  | X               | Y               | Z               |
| C                             | -1.44067000 | 1.03582300  | -0.02471000 | C                                | -1.410040000000 | 1.096841000000  | -0.020095000000 |
| C                             | -1.54352000 | -0.35125100 | -0.06351900 | C                                | -1.497584000000 | -0.314036000000 | -0.074353000000 |
| C                             | -2.73372200 | -1.00677500 | 0.19538400  | C                                | -2.711289000000 | -1.033554000000 | 0.193326000000  |
| C                             | -3.84856500 | -0.21297400 | 0.50471600  | C                                | -3.853407000000 | -0.311822000000 | 0.519984000000  |
| C                             | -3.73563500 | 1.17142500  | 0.54161400  | C                                | -3.751817000000 | 1.089306000000  | 0.570101000000  |
| C                             | -2.52319500 | 1.83181400  | 0.27602400  | C                                | -2.561668000000 | 1.808312000000  | 0.307898000000  |
| C                             | -0.02324300 | 1.37236400  | -0.35625100 | C                                | -0.046986000000 | 1.436490000000  | -0.349213000000 |
| C                             | -0.23346500 | -0.91665000 | -0.40954700 | C                                | -0.243305000000 | -0.897397000000 | -0.421132000000 |
| H                             | -4.79681000 | -0.69598700 | 0.71342300  | H                                | -4.785862000000 | -0.820544000000 | 0.728163000000  |
| H                             | -4.61538700 | 1.75804800  | 0.78367700  | H                                | -4.641155000000 | 1.656451000000  | 0.823757000000  |
| H                             | -2.45126000 | 2.91253900  | 0.30795300  | H                                | -2.564205000000 | 2.890820000000  | 0.363218000000  |
| N                             | 0.63177700  | 0.15587500  | -0.57139100 | N                                | 0.607099000000  | 0.182862000000  | -0.583149000000 |
| C                             | 2.04243500  | 0.03443600  | -0.91333000 | C                                | 2.008912000000  | 0.071849000000  | -0.922613000000 |
| H                             | 2.14608100  | -0.86004700 | -1.53175300 | H                                | 2.120044000000  | -0.805537000000 | -1.564575000000 |
| H                             | 2.30077900  | 0.90244600  | -1.52421000 | H                                | 2.275063000000  | 0.967090000000  | -1.488682000000 |
| O                             | 0.05031000  | -2.09974200 | -0.53674900 | O                                | 0.012204000000  | -2.122083000000 | -0.551101000000 |
| O                             | 0.50203300  | 2.46390300  | -0.43989100 | O                                | 0.535167000000  | 2.522887000000  | -0.443136000000 |
| O                             | -2.84567800 | -2.35104300 | 0.15828300  | O                                | -2.656902000000 | -2.347522000000 | 0.112631000000  |
| H                             | -1.98263900 | -2.73904400 | -0.07358900 | H                                | -1.728861000000 | -2.614165000000 | -0.137410000000 |
| C                             | 2.94348700  | -0.04987500 | 0.31592300  | C                                | 2.898647000000  | -0.058348000000 | 0.319248000000  |
| C                             | 4.41754900  | -0.17755100 | -0.06254800 | C                                | 4.374900000000  | -0.174287000000 | -0.053772000000 |
| H                             | 2.64109000  | -0.91065000 | 0.92391000  | H                                | 2.587373000000  | -0.939758000000 | 0.891025000000  |
| H                             | 2.79507900  | 0.84511000  | 0.93132000  | H                                | 2.742295000000  | 0.816338000000  | 0.960248000000  |
| C                             | 5.33222700  | -0.25999900 | 1.15689200  | C                                | 5.277685000000  | -0.299980000000 | 1.170861000000  |
| H                             | 4.55566900  | -1.06979800 | -0.68564500 | H                                | 4.516995000000  | -1.044591000000 | -0.705932000000 |
| H                             | 4.70804500  | 0.68019200  | -0.68166800 | H                                | 4.670496000000  | 0.704543000000  | -0.639626000000 |
| H                             | 6.38118200  | -0.35110500 | 0.86080700  | H                                | 6.328950000000  | -0.381025000000 | 0.880048000000  |
| H                             | 5.23713900  | 0.63463600  | 1.78102600  | H                                | 5.177656000000  | 0.572287000000  | 1.825047000000  |
| H                             | 5.08318100  | -1.12714400 | 1.77744100  | H                                | 5.023476000000  | -1.188449000000 | 1.758156000000  |

**Table S7** Cartesian coordinates of equilibrium structure of BHID-Bpin in the S<sub>0</sub> (left) and S<sub>1</sub> (right) optimized with DFT//CAM-B3LYP //6-31+G(d,p) and TD-DFT//CAM-B3LYP //6-31+G(d,p) method, respectively.

| DFT//CAM- B3LYP //6-31+G(d,p) |             |             |             | TD-DFT//CAM-B3LYP //6-31+G(d,p) |                 |                 |                 |
|-------------------------------|-------------|-------------|-------------|---------------------------------|-----------------|-----------------|-----------------|
|                               | X           | Y           | Z           |                                 | X               | Y               | Z               |
| C                             | -5.09464600 | -1.59217500 | -0.15491000 | C                               | -5.180189000000 | -1.470224000000 | -0.165426000000 |
| C                             | -3.75573800 | -1.21255000 | -0.15968600 | C                               | -3.779409000000 | -1.168201000000 | -0.171119000000 |
| C                             | -2.74967200 | -2.15010300 | 0.06310400  | C                               | -2.818878000000 | -2.221365000000 | 0.068077000000  |
| C                             | -3.14544700 | -3.47943700 | 0.28829500  | C                               | -3.268039000000 | -3.517135000000 | 0.288331000000  |
| C                             | -4.49195500 | -3.83283100 | 0.28728900  | C                               | -4.652662000000 | -3.771066000000 | 0.278541000000  |
| C                             | -5.50114600 | -2.89170200 | 0.06452000  | C                               | -5.612867000000 | -2.771245000000 | 0.055890000000  |
| C                             | -5.91367900 | -0.37437100 | -0.42159600 | C                               | -5.892289000000 | -0.252188000000 | -0.427728000000 |
| C                             | -3.69274900 | 0.24600500  | -0.43008500 | C                               | -3.579373000000 | 0.235316000000  | -0.435525000000 |
| H                             | -2.40471400 | -4.24799400 | 0.46618200  | H                               | -2.575054000000 | -4.326837000000 | 0.469011000000  |
| H                             | -4.75528900 | -4.86999600 | 0.46526100  | H                               | -4.988292000000 | -4.788026000000 | 0.451490000000  |
| H                             | -6.54869000 | -3.16870100 | 0.06391700  | H                               | -6.668606000000 | -3.016818000000 | 0.054747000000  |
| N                             | -5.01767800 | 0.67206700  | -0.57307700 | N                               | -4.885831000000 | 0.733073000000  | -0.583119000000 |
| C                             | -5.40325000 | 2.04964500  | -0.84167900 | C                               | -5.171578000000 | 2.123855000000  | -0.840027000000 |
| H                             | -4.61455000 | 2.49081400  | -1.45523900 | H                               | -4.368398000000 | 2.509238000000  | -1.472972000000 |
| H                             | -6.31959600 | 2.01620800  | -1.43546500 | H                               | -6.117815000000 | 2.165481000000  | -1.383283000000 |
| O                             | -2.72858600 | 0.97949400  | -0.52682000 | O                               | -2.553232000000 | 0.929947000000  | -0.531569000000 |
| O                             | -7.12433000 | -0.28045200 | -0.50169200 | O                               | -7.104344000000 | -0.011470000000 | -0.523334000000 |
| O                             | -1.47392800 | -1.72198900 | 0.04797100  | O                               | -1.562087000000 | -1.823391000000 | 0.054104000000  |
| C                             | -5.61488900 | 2.86453500  | 0.43181200  | C                               | -5.263950000000 | 2.945992000000  | 0.452994000000  |
| C                             | -6.01820800 | 4.30609900  | 0.12944700  | C                               | -5.557278000000 | 4.416919000000  | 0.166375000000  |
| H                             | -4.69073500 | 2.85437900  | 1.02149000  | H                               | -4.320372000000 | 2.852610000000  | 1.001346000000  |
| H                             | -6.38897700 | 2.38326800  | 1.04109400  | H                               | -6.052283000000 | 2.523381000000  | 1.085928000000  |
| C                             | -6.23257900 | 5.13452500  | 1.39368400  | C                               | -5.647064000000 | 5.252122000000  | 1.441276000000  |
| H                             | -5.24450500 | 4.77612700  | -0.49020300 | H                               | -4.772893000000 | 4.822815000000  | -0.483977000000 |
| H                             | -6.93710900 | 4.30699900  | -0.46983600 | H                               | -6.497263000000 | 4.497290000000  | -0.393001000000 |
| H                             | -6.52043400 | 6.16158800  | 1.15157100  | H                               | -5.857492000000 | 6.300860000000  | 1.212683000000  |
| H                             | -7.02308400 | 4.70358300  | 2.01695100  | H                               | -6.443993000000 | 4.886044000000  | 2.096856000000  |
| H                             | -5.31911100 | 5.17624100  | 1.99609000  | H                               | -4.708357000000 | 5.213763000000  | 2.003512000000  |
| C                             | 0.90027700  | -1.94032400 | 0.19253300  | C                               | 0.814340000000  | -2.028397000000 | 0.202746000000  |
| C                             | 0.99519100  | -0.57416600 | -0.06549500 | C                               | 0.896056000000  | -0.670516000000 | -0.100897000000 |
| C                             | 2.06896300  | -2.68003100 | 0.39265000  | C                               | 1.984625000000  | -2.750650000000 | 0.447308000000  |
| C                             | 2.24505000  | 0.03828700  | -0.12138600 | C                               | 2.141413000000  | -0.049570000000 | -0.160210000000 |
| H                             | 0.09272100  | 0.00530800  | -0.22198200 | H                               | -0.009167000000 | -0.103063000000 | -0.288016000000 |
| C                             | 3.31015900  | -2.06117400 | 0.33600100  | C                               | 3.220388000000  | -2.120807000000 | 0.387116000000  |
| H                             | 2.00556100  | -3.74615200 | 0.59459500  | H                               | 1.928657000000  | -3.809238000000 | 0.686625000000  |
| C                             | 3.42468100  | -0.68725500 | 0.07750600  | C                               | 3.324539000000  | -0.756387000000 | 0.080995000000  |
| H                             | 2.30279400  | 1.10368900  | -0.32421700 | H                               | 2.192443000000  | 1.008490000000  | -0.399446000000 |

|   |             |             |             |   |                 |                 |                 |
|---|-------------|-------------|-------------|---|-----------------|-----------------|-----------------|
| H | 4.20723600  | -2.65174400 | 0.49574400  | H | 4.120532000000  | -2.695809000000 | 0.581868000000  |
| O | 4.98458400  | 1.35257000  | -0.16159600 | O | 4.867778000000  | 1.286622000000  | -0.227405000000 |
| B | 4.81440300  | 0.00475300  | 0.01584600  | B | 4.708701000000  | -0.052286000000 | 0.013229000000  |
| O | 6.00290200  | -0.66680700 | 0.13441200  | O | 5.900787000000  | -0.703985000000 | 0.188107000000  |
| C | 7.06091300  | 0.32586300  | 0.25834100  | C | 6.945560000000  | 0.306161000000  | 0.284463000000  |
| C | 6.40222900  | 1.59321500  | -0.39034900 | C | 6.287547000000  | 1.531452000000  | -0.440432000000 |
| C | 6.59549800  | 1.67050500  | -1.90272900 | C | 6.509940000000  | 1.534095000000  | -1.950807000000 |
| H | 5.95894400  | 2.46499400  | -2.29952600 | H | 5.872241000000  | 2.299219000000  | -2.400032000000 |
| H | 7.63214000  | 1.90196100  | -2.15878600 | H | 7.548727000000  | 1.765083000000  | -2.198582000000 |
| H | 6.31708600  | 0.73351700  | -2.39169200 | H | 6.252166000000  | 0.569910000000  | -2.396301000000 |
| C | 6.78076100  | 2.91533400  | 0.25624400  | C | 6.639289000000  | 2.888624000000  | 0.145688000000  |
| H | 7.85657200  | 3.09161800  | 0.16857700  | H | 7.714774000000  | 3.072236000000  | 0.070191000000  |
| H | 6.26185100  | 3.73151600  | -0.25264800 | H | 6.122579000000  | 3.672221000000  | -0.414070000000 |
| H | 6.50772600  | 2.94174800  | 1.31173500  | H | 6.344853000000  | 2.965499000000  | 1.192945000000  |
| C | 8.29833300  | -0.19103300 | -0.45627100 | C | 8.203566000000  | -0.231169000000 | -0.376953000000 |
| H | 9.08997700  | 0.56342200  | -0.44649300 | H | 8.986602000000  | 0.532178000000  | -0.387813000000 |
| H | 8.67208800  | -1.07976400 | 0.05837900  | H | 8.575280000000  | -1.088662000000 | 0.189478000000  |
| H | 8.08484200  | -0.45938400 | -1.49151100 | H | 8.015553000000  | -0.553019000000 | -1.401819000000 |
| C | 7.34057400  | 0.48444100  | 1.75078200  | C | 7.190487000000  | 0.541967000000  | 1.772769000000  |
| H | 7.61810200  | -0.48859700 | 2.16320300  | H | 7.469655000000  | -0.406017000000 | 2.238942000000  |
| H | 8.16473500  | 1.17945300  | 1.92806600  | H | 8.002624000000  | 1.255020000000  | 1.933180000000  |
| H | 6.45981100  | 0.84465800  | 2.28839100  | H | 6.294067000000  | 0.917455000000  | 2.272686000000  |
| C | -0.42318200 | -2.65768400 | 0.26403400  | C | -0.500013000000 | -2.759277000000 | 0.272602000000  |
| H | -0.46763300 | -3.44365200 | -0.49895500 | H | -0.559558000000 | -3.537746000000 | -0.495384000000 |
| H | -0.54410100 | -3.12756900 | 1.24707600  | H | -0.640082000000 | -3.225249000000 | 1.253390000000  |

**Table S8** Cartesian coordinates of equilibrium structure of truncated BHID-Bpin model in the  $S_0$  (left) and the  $S_1$  transition state (right) optimized with TD-DFT//CAM- B3LYP //6-31G(d,p) method.

| TD-DFT//CAM- B3LYP //6-31G(d,p) |             |             |             | TD-DFT//CAM- B3LYP //6-31G(d,p) |             |             |             |
|---------------------------------|-------------|-------------|-------------|---------------------------------|-------------|-------------|-------------|
| X                               | Y           | Z           |             | X                               | Y           | Z           |             |
| C                               | 3.07882000  | 0.35710200  | -0.00000300 | C                               | -3.04135900 | 0.28541200  | -0.03274400 |
| C                               | 1.75706400  | -0.07581000 | 0.00000800  | C                               | -1.70165500 | -0.03472900 | 0.16548400  |
| C                               | 0.70808500  | 0.84021800  | -0.00000200 | C                               | -0.73616600 | 0.96086200  | 0.23780800  |
| C                               | 1.04206100  | 2.20328200  | -0.00004300 | C                               | -1.15578600 | 2.28609800  | 0.05475600  |
| C                               | 2.37285100  | 2.60998700  | -0.00005800 | C                               | -2.49648900 | 2.58235300  | -0.16908200 |
| C                               | 3.42429300  | 1.69194700  | -0.00003700 | C                               | -3.47212800 | 1.58307200  | -0.21044800 |
| C                               | 3.96075700  | -0.84745700 | 0.00002800  | C                               | -3.81697000 | -0.98927200 | -0.07944400 |
| C                               | 1.74844900  | -1.56186500 | 0.00003100  | C                               | -1.56560800 | -1.51461300 | 0.17193100  |
| H                               | 0.26405000  | 2.95549200  | -0.00005800 | H                               | -0.43046500 | 3.09022900  | 0.08452700  |
| H                               | 2.58900400  | 3.67282600  | -0.00009200 | H                               | -2.78541800 | 3.61929200  | -0.30173300 |
| H                               | 4.46003800  | 2.00923200  | -0.00005000 | H                               | -4.51658000 | 1.81402000  | -0.38249100 |
| N                               | 3.09556900  | -1.93222800 | 0.00007500  | N                               | -2.87250600 | -1.99667800 | 0.07019000  |
| O                               | 0.81945500  | -2.33918200 | 0.00001600  | O                               | -0.57212800 | -2.20815600 | 0.19090400  |
| O                               | 5.17074400  | -0.89935500 | 0.00001400  | O                               | -5.01013900 | -1.14641200 | -0.21263000 |
| O                               | -0.54340900 | 0.35306800  | 0.00003200  | O                               | 0.53125100  | 0.59690600  | 0.51925400  |
| C                               | -2.92239600 | 0.44915400  | 0.00000100  | C                               | 2.84477500  | 0.49698500  | -0.04167700 |
| C                               | -2.91905000 | -0.94308300 | -0.00011700 | C                               | 2.76651200  | -0.88970000 | -0.17243700 |
| C                               | -4.13971600 | 1.13127800  | 0.00011400  | C                               | 4.09379600  | 1.10722300  | 0.05459500  |
| C                               | -4.12321500 | -1.64274000 | -0.00012300 | C                               | 3.93169300  | -1.64820400 | -0.22363400 |
| H                               | -1.97434400 | -1.47416800 | -0.00018700 | H                               | 1.79606800  | -1.37457600 | -0.21222700 |
| C                               | -5.33876800 | 0.43127700  | 0.00010000  | C                               | 5.25652200  | 0.34762600  | -0.01121100 |
| H                               | -4.14903400 | 2.21792500  | 0.00021100  | H                               | 4.15817900  | 2.18342500  | 0.18838500  |
| C                               | -5.33385000 | -0.96118900 | -0.00001500 | C                               | 5.17788100  | -1.03294300 | -0.15638300 |
| H                               | -4.11113900 | -2.72805500 | -0.00020900 | H                               | 3.86564200  | -2.72802400 | -0.31221000 |
| H                               | -6.27896800 | 0.97317100  | 0.00018800  | H                               | 6.22369700  | 0.83386500  | 0.06512900  |
| H                               | 3.40316300  | -2.89457100 | 0.00003500  | H                               | -3.09623900 | -2.98070700 | 0.01809600  |
| C                               | -1.64502500 | 1.25057600  | -0.00001200 | C                               | 1.60122600  | 1.34521100  | -0.05844600 |
| H                               | -1.59904500 | 1.89551800  | -0.88604100 | H                               | 1.77387700  | 2.27140600  | 0.50154300  |
| H                               | -1.59907800 | 1.89559400  | 0.88596300  | H                               | 1.32531600  | 1.62409900  | -1.08252200 |
| H                               | -6.27011300 | -1.50967100 | -0.00001700 | H                               | 6.08413100  | -1.62726500 | -0.21246300 |

**Table S9** Cartesian coordinates of MECI of truncated BHID-Bpin model located between the  $S_0$  and  $S_1$  state optimized with SA2-CASSCF(4,4)//6-31G(d,p) method.

| SA2-CASSCF(4,4) //6-31G(d,p) |               |               |               |
|------------------------------|---------------|---------------|---------------|
|                              | X             | Y             | Z             |
| C                            | 2.8428050735  | 0.1734020199  | -0.0540555658 |
| C                            | 1.4324533905  | 0.1382920382  | -0.0853239639 |
| C                            | 0.7234732230  | 1.3300431367  | -0.2512726333 |
| C                            | 1.4354466248  | 2.5104668569  | -0.3650542253 |
| C                            | 2.8295763738  | 2.5279881988  | -0.3137381691 |
| C                            | 3.5492532973  | 1.3490395842  | -0.1591870331 |
| C                            | 3.3386191406  | -1.2031473586 | 0.0760706445  |
| C                            | 1.0421716955  | -1.2369409620 | 0.0282584533  |
| H                            | 0.8859463063  | 3.4192438113  | -0.5061897779 |
| H                            | 3.3453009234  | 3.4632585351  | -0.4038432915 |
| H                            | 4.6204511871  | 1.3436011880  | -0.1278995034 |
| N                            | 2.1831719646  | -1.9830482880 | 0.1007811725  |
| O                            | -0.0936331026 | -1.8543731246 | 0.1002973998  |
| O                            | 4.4773959455  | -1.6291017733 | 0.1536137461  |
| O                            | -0.6405722887 | 1.3351738844  | -0.3776779144 |
| C                            | -2.7171387558 | 0.4789140380  | 0.4212205615  |
| C                            | -2.5403306021 | -0.8315338468 | -0.0354618072 |
| C                            | -4.0018089677 | 0.9913650459  | 0.5022972419  |
| C                            | -3.6271356302 | -1.6172877551 | -0.4068004210 |
| H                            | -1.0307464422 | -1.3898900456 | -0.0337156583 |
| C                            | -5.0970148095 | 0.2098576698  | 0.1435082832  |
| H                            | -4.1572957142 | 2.0024571154  | 0.8322971463  |
| C                            | -4.9085106477 | -1.0884519628 | -0.3101585914 |
| H                            | -3.4828607615 | -2.6185527136 | -0.7637409956 |
| H                            | -6.0870226433 | 0.6180963257  | 0.2094603844  |
| H                            | 2.1810501040  | -2.9691611700 | 0.2154306836  |
| C                            | -1.5124443601 | 1.2860335442  | 0.7955059683  |
| H                            | -1.7649271905 | 2.2990881773  | 1.0717967150  |
| H                            | -0.9650182961 | 0.8259582828  | 1.6104121775  |
| H                            | -5.7550610379 | -1.6864824523 | -0.5915500267 |



**Table S10** Cartesian coordinates of the transition state of the BHID in the S<sub>1</sub> (left) and equilibrium structure of keto-BHID on the S<sub>1</sub> state (right) state optimized with TD-DFT//CAM-B3LYP //6-31+G(d,p) method.

| TD-DFT//CAM- B3LYP //6-31+G(d,p) |                 |                 |                 | TD-DFT//CAM- B3LYP //6-31+G(d,p) |                 |                 |                 |
|----------------------------------|-----------------|-----------------|-----------------|----------------------------------|-----------------|-----------------|-----------------|
|                                  | X               | Y               | Z               |                                  | X               | Y               | Z               |
| C                                | -1.435974000000 | 1.122418000000  | -0.009334000000 | C                                | -1.457443000000 | 1.065001000000  | -0.016626000000 |
| C                                | -1.509519000000 | -0.268105000000 | -0.062944000000 | C                                | -1.521052000000 | -0.330570000000 | -0.066829000000 |
| C                                | -2.670254000000 | -1.069103000000 | 0.185896000000  | C                                | -2.715172000000 | -1.105019000000 | 0.193603000000  |
| C                                | -3.850130000000 | -0.380438000000 | 0.519640000000  | C                                | -3.874154000000 | -0.341156000000 | 0.519493000000  |
| C                                | -3.785359000000 | 1.019439000000  | 0.577414000000  | C                                | -3.798365000000 | 1.052258000000  | 0.567135000000  |
| C                                | -2.622190000000 | 1.790198000000  | 0.323815000000  | C                                | -2.621522000000 | 1.778578000000  | 0.307407000000  |
| C                                | -0.061767000000 | 1.457138000000  | -0.342305000000 | C                                | -0.093371000000 | 1.439423000000  | -0.342675000000 |
| C                                | -0.264569000000 | -0.844364000000 | -0.407770000000 | C                                | -0.236344000000 | -0.839839000000 | -0.411528000000 |
| H                                | -4.770324000000 | -0.913661000000 | 0.723014000000  | H                                | -4.802992000000 | -0.860432000000 | 0.726218000000  |
| H                                | -4.691559000000 | 1.558491000000  | 0.833579000000  | H                                | -4.695227000000 | 1.610045000000  | 0.817241000000  |
| H                                | -2.672445000000 | 2.871070000000  | 0.390548000000  | H                                | -2.621139000000 | 2.861534000000  | 0.357286000000  |
| N                                | 0.598447000000  | 0.187576000000  | -0.577773000000 | N                                | 0.600117000000  | 0.188314000000  | -0.576936000000 |
| C                                | 2.005498000000  | 0.076547000000  | -0.921784000000 | C                                | 2.014887000000  | 0.106373000000  | -0.915887000000 |
| H                                | 2.115939000000  | -0.791586000000 | -1.576300000000 | H                                | 2.142857000000  | -0.734242000000 | -1.601771000000 |
| H                                | 2.264613000000  | 0.975214000000  | -1.485212000000 | H                                | 2.256731000000  | 1.028899000000  | -1.446814000000 |
| O                                | -0.105923000000 | -2.117168000000 | -0.517457000000 | O                                | 0.106102000000  | -2.101488000000 | -0.556686000000 |
| O                                | 0.530056000000  | 2.532726000000  | -0.442530000000 | O                                | 0.470067000000  | 2.525859000000  | -0.438631000000 |
| O                                | -2.464551000000 | -2.342688000000 | 0.066600000000  | O                                | -2.622919000000 | -2.364483000000 | 0.110600000000  |
| H                                | -1.305181000000 | -2.451320000000 | -0.233050000000 | H                                | -0.710614000000 | -2.628326000000 | -0.380945000000 |
| C                                | 2.897392000000  | -0.059038000000 | 0.314031000000  | C                                | 2.898968000000  | -0.055010000000 | 0.320810000000  |
| C                                | 4.373579000000  | -0.165314000000 | -0.062806000000 | C                                | 4.379188000000  | -0.121147000000 | -0.050054000000 |
| H                                | 2.593079000000  | -0.946095000000 | 0.881339000000  | H                                | 2.608941000000  | -0.966359000000 | 0.856103000000  |
| H                                | 2.739718000000  | 0.809539000000  | 0.963134000000  | H                                | 2.721504000000  | 0.787965000000  | 0.997906000000  |
| C                                | 5.279859000000  | -0.296912000000 | 1.158627000000  | C                                | 5.280389000000  | -0.277464000000 | 1.172013000000  |
| H                                | 4.518344000000  | -1.029590000000 | -0.722402000000 | H                                | 4.543777000000  | -0.959710000000 | -0.737550000000 |
| H                                | 4.663921000000  | 0.719576000000  | -0.642079000000 | H                                | 4.656245000000  | 0.788146000000  | -0.597055000000 |
| H                                | 6.330738000000  | -0.371522000000 | 0.864931000000  | H                                | 6.334035000000  | -0.322112000000 | 0.882394000000  |
| H                                | 5.177697000000  | 0.569941000000  | 1.819633000000  | H                                | 5.158140000000  | 0.564104000000  | 1.861623000000  |
| H                                | 5.030273000000  | -1.190854000000 | 1.739492000000  | H                                | 5.044853000000  | -1.195373000000 | 1.720490000000  |

**Table S11** Cartesian coordinates of the enol-BHID-H<sub>2</sub>O complex in S<sub>0</sub> optimized with DFT//CAM-B3LYP //6-31+G(d,p) method.

| DFT//CAM-B3LYP //6-31+G(d,p) method. |             |             |             |
|--------------------------------------|-------------|-------------|-------------|
|                                      | X           | Y           | Z           |
| C                                    | 1.19487600  | -1.44130000 | -0.08814600 |
| C                                    | 1.43531400  | -0.05930400 | -0.01889500 |
| C                                    | 2.70898700  | 0.40678500  | 0.31323400  |
| C                                    | 3.69713800  | -0.56926000 | 0.57172900  |
| C                                    | 3.43194100  | -1.92295300 | 0.49712200  |
| C                                    | 2.15250400  | -2.39275200 | 0.15761200  |
| C                                    | -0.23405500 | -1.64303500 | -0.44707500 |
| C                                    | 0.15177900  | 0.61876200  | -0.32321200 |
| H                                    | 4.68861600  | -0.21569300 | 0.83303300  |
| H                                    | 4.22834000  | -2.62963200 | 0.70439100  |
| H                                    | 1.92947700  | -3.45135200 | 0.09645600  |
| N                                    | -0.78659700 | -0.37389600 | -0.56657900 |
| C                                    | -2.18162600 | -0.11460600 | -0.89686300 |
| H                                    | -2.21043500 | 0.81454000  | -1.46986800 |
| H                                    | -2.50966400 | -0.92834600 | -1.54742500 |
| O                                    | -0.12496300 | 1.81035200  | -0.37068100 |
| O                                    | -0.83796100 | -2.68491500 | -0.61394100 |
| O                                    | 3.10802700  | 1.67817800  | 0.42776700  |
| H                                    | 2.47683900  | 2.39258100  | 0.14953300  |
| C                                    | -3.07224600 | -0.01746100 | 0.33900400  |
| C                                    | -4.53110800 | 0.24811900  | -0.02651500 |
| H                                    | -2.70045200 | 0.78472500  | 0.98710400  |
| H                                    | -2.99706400 | -0.95093500 | 0.90901800  |
| C                                    | -5.43592400 | 0.34507300  | 1.19917200  |
| H                                    | -4.59626500 | 1.17803400  | -0.60484800 |
| H                                    | -4.89074200 | -0.55184500 | -0.68546900 |
| H                                    | -6.47394200 | 0.53583300  | 0.91205500  |
| H                                    | -5.41430100 | -0.58382900 | 1.77855700  |
| H                                    | -5.11700300 | 1.15757300  | 1.86040000  |
| O                                    | 1.65929600  | 3.79428400  | -0.21651900 |
| H                                    | 1.91425100  | 4.23918600  | -1.03473400 |
| H                                    | 0.83784700  | 3.29483200  | -0.39816700 |

## 5. References

- (1) L. Wu, X. Tian, D. J. Lee, J. Yoon, C. S. Lim, H. M. Kim and T. D. James, *Chem. Commun.*, 2021, **57**, 11084-11087.
